# Supplementary material for: Emodin-8-O-Glucoside—Isolation and the Screening of the Anticancer Potential against the Nervous System Tumors
Source: MDPI journal article supplement (doi:10.3390/molecules28217366), 2023-10-31
Supplement: s1 [file s1]

# SUPPLEMENTARY FILE

**Table S1.** MS/MS spectra of the identified compounds.

|                      |                                                                                                    |
|----------------------|----------------------------------------------------------------------------------------------------|
| Emodin               | <p>-ESI Product Ion (rt: 24.324 min) Frag=110.0V CID@20.0 (269.0462[z=1] -&gt; **) 1_5ul_neg.d</p> |
| Emodin-6-O-glucoside | <p>-ESI Product Ion (rt: 21.241 min) Frag=110.0V CID@20.0 (431.1004[z=1] -&gt; **) 1_5ul_neg.d</p> |
| Emodin 8-O-glucoside | <p>-ESI Product Ion (rt: 21.324 min) Frag=110.0V CID@20.0 (431.1004[z=1] -&gt; **) 1_5ul_neg.d</p> |
| Isoquercetin         | <p>-ESI Product Ion (rt: 21.407 min) Frag=110.0V CID@20.0 (463.0902[z=1] -&gt; **) 1_5ul_neg.d</p> |
| Luteolin glucoside   | <p>-ESI Product Ion (rt: 20.557 min) Frag=110.0V CID@10.0 (447.0950[z=1] -&gt; **) 1_5ul_neg.d</p> |

|                                         |                                                                                                                                                                                                                                |
|-----------------------------------------|--------------------------------------------------------------------------------------------------------------------------------------------------------------------------------------------------------------------------------|
| <p><b>Sacranoside</b><br/><b>A</b></p>  | 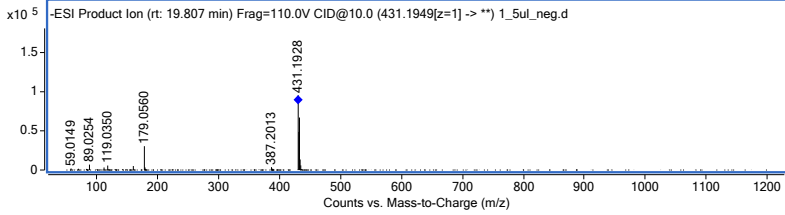 <p>-ESI Product Ion (rt: 19.807 min) Frag=110.0V CID@10.0 (431.1949[z=1] -&gt; **) 1_5ul_neg.d</p> <p>Counts vs. Mass-to-Charge (m/z)</p>   |
| <p><b>Procyanidin</b><br/><b>B6</b></p> |  <p>-ESI Product Ion (rt: 19.974 min) Frag=110.0V CID@10.0 (577.1381[z=1] -&gt; **) 1_5ul_neg.d</p> <p>Counts vs. Mass-to-Charge (m/z)</p>   |
| <p><b>Quercetin</b></p>                 |  <p>-ESI Product Ion (rt: 22.324 min) Frag=110.0V CID@20.0 (301.0370[z=1] -&gt; **) 1_5ul_neg.d</p> <p>Counts vs. Mass-to-Charge (m/z)</p>  |
| <p><b>Luteolin</b></p>                  |  <p>-ESI Product Ion (rt: 22.708 min) Frag=110.0V CID@20.0 (285.0420[z=1] -&gt; **) 1_5ul_neg.d</p> <p>Counts vs. Mass-to-Charge (m/z)</p> |
| <p><b>Citric acid</b></p>               |  <p>-ESI Product Ion (rt: 3.522 min) Frag=110.0V CID@10.0 (191.0209[z=1] -&gt; **) 1_5ul_neg.d</p> <p>Counts vs. Mass-to-Charge (m/z)</p>  |

|                          |                                                                                                                                           |
|--------------------------|-------------------------------------------------------------------------------------------------------------------------------------------|
| Gallic acid              | <p>-ESI Product Ion (rt: 16.223 min) Frag=110.0V CID@10.0 (169.0152[z=1] -&gt; **) 1_5ul_neg.d</p> <p>Counts vs. Mass-to-Charge (m/z)</p> |
| Bergapten                | <p>-ESI Product Ion (rt: 1.972 min) Frag=110.0V CID@10.0 (215.0331 -&gt; **) 1_5ul_neg.d</p> <p>Counts vs. Mass-to-Charge (m/z)</p>       |
| Malic acid               | <p>-ESI Product Ion (rt: 2.889 min) Frag=110.0V CID@10.0 (133.0145[z=1] -&gt; **) 1_5ul_neg.d</p> <p>Counts vs. Mass-to-Charge (m/z)</p>  |
| Citric acid              | <p>-ESI Product Ion (rt: 3.439 min) Frag=110.0V CID@10.0 (191.0209[z=1] -&gt; **) 1_5ul_neg.d</p> <p>Counts vs. Mass-to-Charge (m/z)</p>  |
| 3-p-coumaroylquinic acid | <p>-ESI Product Ion (rt: 19.141 min) Frag=110.0V CID@10.0 (337.0943[z=1] -&gt; **) 1_5ul_neg.d</p> <p>Counts vs. Mass-to-Charge (m/z)</p> |

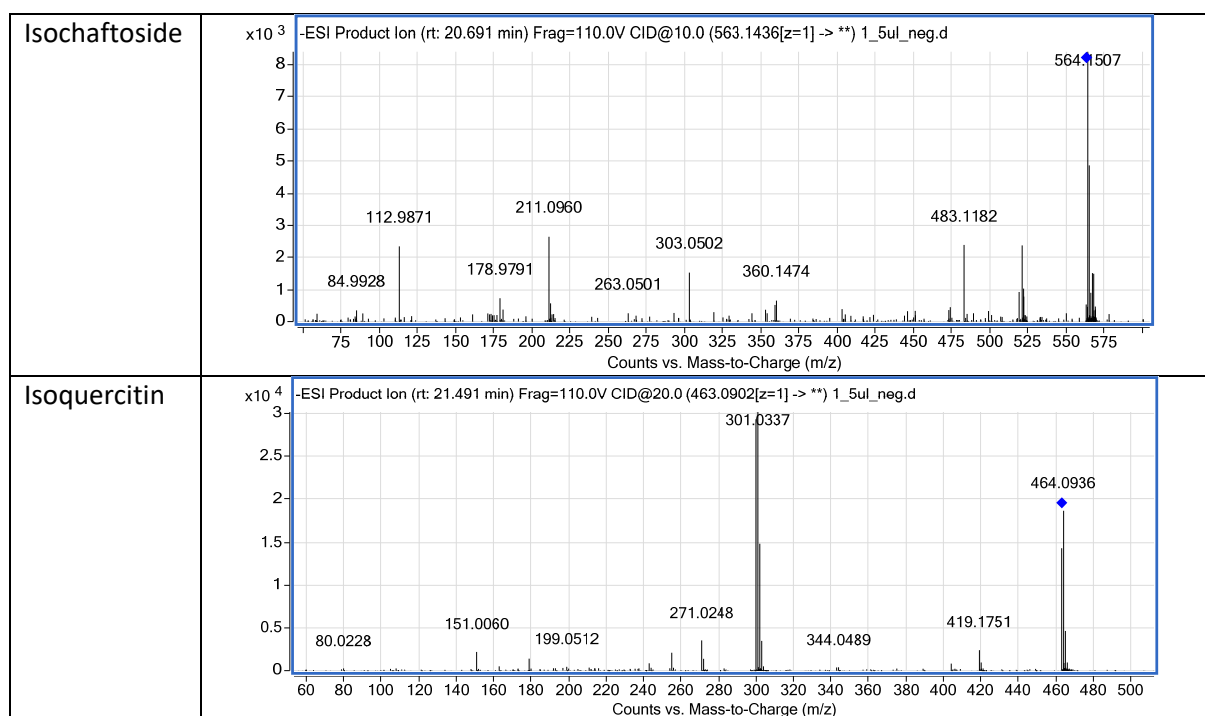

**Table S2.** The partition coefficients of main compounds of *Reynoutria japonica* extract.

| Solvent system | RT        | Upper       | Lower       | K           |
|----------------|-----------|-------------|-------------|-------------|
| 1              | 18.6-18.8 | 58097239.82 | 1340267.37  | 43.3475     |
|                | 2.8-2.9   | 2099046.97  | 10450229.62 | 0.200861325 |
|                | 14.7      | 518177.37   | 518177.37   | 1           |
|                | 13.4-13.7 | 3059086.66  | 525192.05   | 5.824701002 |
|                | 2-2.3     | 18210901.09 | 6482046.5   | 2.809436972 |
| 2              | 14        | 3104945.16  | 8937374.49  | 0.34741133  |
|                | 19.1-19.2 | 6220079.69  | 3102510.49  | 2.004853718 |
|                | 13.4      | 1372222.59  | 1953007.11  | 0.702620376 |
|                | 31.3      | 20910055.67 | 25363253.51 | 0.824423241 |
|                | 24.7      | 802523.21   | 14454896.31 | 0.055519126 |
|                | 23.8-23.7 | 8085243.89  | 981185.87   | 8.240277543 |
| 3              | 18.3-18.5 | 1125871.95  | 1438062.8   | 0.782908751 |
|                | 18.6-19.1 | 11758022.84 | 4266784.77  | 2.755710324 |
|                | 30        | 2002144.87  | 3214375.3   | 0.622872155 |
|                | 31.4-31.6 | 18974832.23 | 6890689.74  | 2.753691277 |
| 4              | 18.5      | 162945.97   | 162404.71   | 1.003332785 |
|                | 18.7-19   | 1102254.22  | 711543.22   | 1.549103679 |
|                | 29.6      | 332057.43   | 131645.01   | 2.522370047 |
|                | 31.4-31.2 | 80732.12    | 237487.03   | 0.33994328  |
| 5              | 18.4      | 118222.13   | 192285.57   | 0.614825803 |
|                | 18.7-19   | 1035649.51  | 605339.36   | 1.710857708 |
|                | 21.8-21.1 | 9957.76     | 41411.08    | 0.240461249 |
|                | 22.7      | 64475.67    | 33757.41    | 1.909970878 |

|   |           |            |           |             |
|---|-----------|------------|-----------|-------------|
| 6 | 2         | 150954.64  | 240360.7  | 0.628033784 |
|   | 3.3-3.2   | 173928.03  | 16286.24  | 10.67944658 |
|   | 13.5-13.4 | 300317.96  | 300317.96 | 1           |
|   | 14        | 919370.9   | 210446.15 | 4.368675312 |
|   | 15.6-15.3 | 300317.96  | 6278.24   | 47.83473712 |
|   | 19        | 1462667.17 | 23092.13  | 63.34050475 |
|   | 19.9-20.2 | 128859.81  | 29786.92  | 4.326053516 |
| 7 | 18.8-19.1 | 1416808.58 | 452956.96 | 3.127909945 |
|   | 19.8-19.9 | 98109.77   | 56558.8   | 1.734650841 |
|   | 22.2-22.7 | 30719.87   | 190708.7  | 0.161082688 |
|   | 15.4-15.2 | 141592.91  | 64657.68  | 2.189885409 |

(RT – retention time, Upper – peak area in the upper phase, Lower – peak area in the lower phase, K – the calculated partition coefficient value that was obtained by dividing Upper by Lower values)
